# Supplementary material for: Human angiogenin is a potent cytotoxin in the absence of ribonuclease inhibitor
Source: PubMed Central journal article supplement — RNA. 2018 Aug;24(8):1018–27. doi: 10.1261/rna.065516.117 (PMC6049508; doi:10.1261/rna.065516.117), 2018-08
Supplement: supp_065516.117_Supplemental_Information.pdf [file supp_065516.117_Supplemental_Information.pdf]

# Human angiogenin is a potent cytotoxin in the absence of ribonuclease inhibitor

**SYDNEY P. THOMAS,<sup>1</sup> TRISH T. HOANG,<sup>2</sup> VALERIE T. RESSLER,<sup>4</sup>**

**and RONALD T. RAINES<sup>2,3,4</sup>**

<sup>1</sup>Graduate Program in Cell & Molecular Biology, <sup>2</sup>Department of Biochemistry, and <sup>3</sup>Department of Chemistry, University of Wisconsin–Madison, Madison, Wisconsin 53706, USA, and

<sup>4</sup>Department of Chemistry, Massachusetts Institute of Technology, Cambridge, Massachusetts 02139, USA

**Corresponding author: [rtraines@mit.edu](mailto:rtraines@mit.edu)**

---

| <b>TABLE OF CONTENTS</b>                               |             |
|--------------------------------------------------------|-------------|
| <b>Content</b>                                         | <b>Page</b> |
| <b>Table S1.</b> tRFs with differential levels         | S2          |
| <b>Table S2.</b> Average tRF expression                | S2–S8       |
| <b>Table S3.</b> tRNAs with differential levels        | S9–S15      |
| <b>Table S4.</b> miRNAs with differential levels       | S16–S17     |
| <b>Table S5.</b> Enriched GO terms in miRNAs           | S18–S20     |
| <b>Figure S1.</b> Toxicity of ANG and related proteins | S21         |

---

**TABLE S1.** tRFs with differential levels

| tRF Type  | Precursor tRNA           | Length | $\Delta RNH1$ |       | WT    |       |
|-----------|--------------------------|--------|---------------|-------|-------|-------|
|           |                          |        | A/R           | A/U   | A/R   | A/U   |
| tRF-1     | tRNA-Ile-AAT-2-1         | 17     | -             | -     | -     | -2.06 |
| tRF-1     | tRNA-Ile-AAT-5-2         | 17     | -3.13         | -1.75 | -1.60 | -1.83 |
| tRF-1     | tRNA-Val-TAC-3-1         | 17     | -             | -     | -     | -2.26 |
| tRF-3     | tRNA-Ala-TGC-4-1         | 18     | -             | -     | -     | -1.65 |
| tRF-3     | tRNA-Gly-TCC-1-1         | 22     | -             | -     | -2.71 | -1.62 |
| tRF-3     | tRNA-Gly-TCC-2-2         | 22     | -             | -     | -2.71 | -1.62 |
| tRF-3     | tRNA-Gly-TCC-3-1         | 22     | -             | -     | -2.71 | -1.62 |
| tRF-3     | tRNA-Pro-TGG-1-1         | 22     | -2.81         | -     | -     | -     |
| tRF-3     | tRNA-Pro-TGG-3-1         | 22     | -2.81         | -     | -     | -     |
| tRF-3     | tRNA-Ser-TGA-4-1         | 18     | -3.04         | -1.66 | -     | -     |
| tRF-3     | tRNA-Tyr-GTA-2-1         | 17     | -             | -     | -2.36 | -     |
| tRF-3     | tRNA-Tyr-GTA-5-2         | 17     | -             | -     | -2.36 | -     |
| tRF-3     | tRNA-Tyr-GTA-7-1         | 17     | -             | -     | -2.43 | -     |
| tRF-3     | tRNA-Val-AAC-2-1         | 17     | -3.81         | -2.30 | -     | -1.28 |
| tRF-3     | tRNA-Val-AAC-chr6-84     | 17     | -3.84         | -2.25 | -     | -1.27 |
| tRF-5     | nm-tRNA-Tyr-GTA-chr1-125 | 32     | -             | -     | -     | -2.80 |
| tRF-5     | nm-tRNA-Tyr-GTA-chr14-8  | 32     | -             | -     | -     | -2.80 |
| tRF-5     | tRNA-Gly-GCC-1-4         | 32     | 2.66          | 1.28  | 2.37  | 2.80  |
| tRF-5     | tRNA-iMet-CAT-1-2        | 31     | -             | -0.98 | -     | -     |
| tRF-5     | tRNA-iMet-CAT-2-1        | 31     | -             | -0.98 | -     | -     |
| tRF-5     | tRNA-Leu-CAG-1-7         | 26     | -3.02         | -2.78 | -1.19 | -     |
| tRF-5     | tRNA-Leu-CAG-2-2         | 26     | -3.02         | -2.78 | -1.19 | -     |
| tRF-5     | tRNA-Lys-CTT-2-4         | 32     | -1.73         | -1.69 | -     | -     |
| tRF-5     | tRNA-Lys-CTT-3-1         | 32     | -2.43         | -2.95 | -     | -     |
| tRF-5     | tRNA-Lys-TTT-3-3         | 32     | -             | -2.16 | -     | -     |
| tRF-5     | tRNA-Lys-TTT-5-1         | 32     | -             | -2.16 | -     | -     |
| tRF-5     | tRNA-Val-AAC-1-5         | 32     | -             | -1.25 | 1.81  | -     |
| tRF-5     | tRNA-Val-AAC-3-1         | 32     | -             | -1.25 | 1.81  | -     |
| tRF-5     | tRNA-Val-AAC-4-1         | 32     | -             | -1.25 | 1.81  | -     |
| tRF-5     | tRNA-Val-AAC-5-1         | 23     | -2.68         | -1.75 | -1.28 | -     |
| tRF-5     | tRNA-Val-CAC-1-6         | 32     | -             | -1.14 | 1.84  | -     |
| tRF-5     | tRNA-Val-CAC-4-1         | 32     | -             | -1.14 | 1.84  | -     |
| tRF-5     | tRNA-Val-CAC-5-1         | 32     | -             | -1.14 | 1.84  | -     |
| tRF-novel | tRNA-Gln-TTG-1-1         | 19     | -3.07         | -2.26 | -1.38 | -     |
| tRF-novel | tRNA-Gln-TTG-3-1         | 19     | -2.69         | -1.87 | -1.46 | -     |

Values are for  $\log_2$ (fold change) in tRF levels as calculated with NOISeqBIO. Treatments: A/R,  $\log_2$ (ANG/RNase 1); A/U,  $\log_2$ (ANG/untreated). All values of  $\log_2$ (fold change) have  $p \leq 0.05$ . Each tRF was measured in 2 of 3 biological replicates in both conditions.

**TABLE S2.** Average tRF Expression

| Type  | Precursor tRNA   | Length | $\Delta RNH1$ (%) |      |      | WT (%) |      |      |
|-------|------------------|--------|-------------------|------|------|--------|------|------|
|       |                  |        | A                 | R    | U    | A      | R    | U    |
| tRF-1 | tRNA-Ala-CGC-2-1 | 18     | -                 | -    | 0.34 | 0.18   | 0.41 | 0.29 |
| tRF-1 | tRNA-Arg-ACG-1-2 | 19     | -                 | -    | 0.32 | 0.12   | 0.42 | 0.30 |
| tRF-1 | tRNA-Arg-CCT-2-1 | 30     | -                 | -    | -    | -      | 0.12 | 0.18 |
| tRF-1 | tRNA-Arg-TCG-2-1 | 29     | -                 | -    | -    | -      | 0.19 | 0.20 |
| tRF-1 | tRNA-Cys-GCA-2-4 | 23     | -                 | -    | 0.39 | 0.16   | 0.24 | 0.24 |
| tRF-1 | tRNA-Glu-CTC-2-1 | 22     | -                 | 0.10 | -    | -      | 0.14 | 0.22 |
| tRF-1 | tRNA-Gly-GCC-1-4 | 17     | -                 | -    | -    | -      | -    | 0.20 |
| tRF-1 | tRNA-Gly-GCC-4-1 | 17     | -                 | -    | -    | -      | -    | 0.20 |
| tRF-1 | tRNA-Ile-AAT-2-1 | 17     | -                 | 0.26 | 0.43 | 0.16   | 0.45 | 0.43 |
| tRF-1 | tRNA-Ile-AAT-5-2 | 17     | 0.16              | 0.53 | 1.39 | 0.61   | 1.23 | 1.44 |
| tRF-1 | tRNA-Leu-TAG-3-1 | 21     | -                 | -    | -    | -      | -    | 0.10 |
| tRF-1 | tRNA-Ser-TGA-1-1 | 20     | -                 | -    | -    | 0.24   | 0.44 | 0.39 |
| tRF-1 | tRNA-Thr-AGT-1-3 | 28     | -                 | -    | -    | -      | 0.22 | 0.21 |
| tRF-1 | tRNA-Thr-CGT-3-1 | 17     | -                 | -    | 0.40 | 0.16   | -    | -    |
| tRF-1 | tRNA-Thr-CGT-3-1 | 18     | -                 | -    | -    | -      | -    | 0.40 |
| tRF-1 | tRNA-Val-TAC-3-1 | 17     | -                 | -    | 0.71 | 0.24   | 0.39 | 0.76 |
| tRF-1 | tRNA-Val-TAC-3-1 | 18     | -                 | 0.21 | -    | -      | -    | -    |
| tRF-3 | tRNA-Ala-AGC-1-1 | 22     | -                 | -    | -    | 0.16   | -    | 0.16 |
| tRF-3 | tRNA-Ala-AGC-2-1 | 17     | 0.11              | -    | -    | -      | -    | -    |
| tRF-3 | tRNA-Ala-AGC-2-1 | 18     | -                 | 0.49 | 0.97 | 0.55   | 1.05 | 0.94 |
| tRF-3 | tRNA-Ala-AGC-3-1 | 17     | 0.11              | -    | -    | -      | -    | -    |
| tRF-3 | tRNA-Ala-AGC-3-1 | 18     | -                 | 0.48 | 0.97 | 0.55   | 1.04 | 0.92 |
| tRF-3 | tRNA-Ala-CGC-1-1 | 22     | -                 | 0.35 | 0.60 | 0.43   | 0.71 | 0.68 |
| tRF-3 | tRNA-Ala-CGC-2-1 | 22     | -                 | 0.35 | 0.63 | 0.43   | 0.71 | 0.67 |
| tRF-3 | tRNA-Ala-CGC-3-1 | 17     | -                 | 0.29 | -    | -      | -    | -    |
| tRF-3 | tRNA-Ala-CGC-3-1 | 18     | -                 | -    | 0.45 | 0.25   | 0.57 | 0.50 |
| tRF-3 | tRNA-Ala-TGC-1-1 | 17     | 0.09              | -    | -    | -      | -    | -    |
| tRF-3 | tRNA-Ala-TGC-1-1 | 18     | -                 | 0.41 | 0.90 | 0.53   | 0.91 | 0.91 |
| tRF-3 | tRNA-Ala-TGC-2-1 | 22     | -                 | 0.35 | 0.60 | 0.43   | 0.71 | 0.68 |
| tRF-3 | tRNA-Ala-TGC-3-1 | 22     | -                 | 0.35 | 0.63 | 0.43   | 0.71 | 0.67 |
| tRF-3 | tRNA-Ala-TGC-4-1 | 17     | -                 | 0.30 | -    | -      | -    | -    |
| tRF-3 | tRNA-Ala-TGC-4-1 | 18     | -                 | -    | 0.46 | 0.25   | 0.56 | 0.52 |
| tRF-3 | tRNA-Ala-TGC-6-1 | 17     | 0.09              | -    | -    | -      | -    | -    |
| tRF-3 | tRNA-Ala-TGC-6-1 | 18     | -                 | 0.41 | 0.90 | 0.53   | 0.91 | 0.89 |
| tRF-3 | tRNA-Asp-GTC-2-7 | 22     | -                 | -    | -    | -      | 0.94 | -    |
| tRF-3 | tRNA-Asp-GTC-3-1 | 22     | -                 | 0.27 | -    | -      | 0.82 | -    |
| tRF-3 | tRNA-Cys-GCA-11- | 17     | -                 | -    | -    | -      | 0.38 | 0.34 |
| tRF-3 | tRNA-Cys-GCA-14- | 17     | -                 | -    | -    | -      | 0.38 | 0.34 |
| tRF-3 | tRNA-Cys-GCA-2-1 | 17     | -                 | -    | -    | -      | 0.38 | 0.34 |
| tRF-3 | tRNA-Cys-GCA-4-1 | 17     | -                 | -    | -    | -      | 0.38 | 0.34 |
| tRF-3 | tRNA-Cys-GCA-5-1 | 17     | -                 | -    | -    | -      | 0.38 | 0.34 |

|       |                  |    |      |      |      |      |      |      |
|-------|------------------|----|------|------|------|------|------|------|
| tRF-3 | tRNA-Cys-GCA-7-1 | 17 | -    | -    | -    | -    | 0.38 | 0.34 |
| tRF-3 | tRNA-Cys-GCA-8-1 | 17 | -    | -    | -    | -    | 0.38 | 0.34 |
| tRF-3 | tRNA-Gln-CTG-5-1 | 17 | -    | 0.10 | -    | -    | 0.26 | 0.24 |
| tRF-3 | tRNA-Gln-TTG-1-1 | 17 | -    | -    | -    | -    | -    | 0.38 |
| tRF-3 | tRNA-Gln-TTG-1-1 | 18 | -    | -    | 0.39 | -    | -    | -    |
| tRF-3 | tRNA-Gln-TTG-2-1 | 17 | -    | 0.13 | -    | -    | 0.20 | 0.30 |
| tRF-3 | tRNA-Gln-TTG-2-1 | 18 | -    | -    | 0.40 | -    | -    | -    |
| tRF-3 | tRNA-Gln-TTG-3-1 | 17 | -    | -    | -    | -    | -    | 0.38 |
| tRF-3 | tRNA-Gln-TTG-3-1 | 18 | -    | -    | 0.39 | -    | -    | -    |
| tRF-3 | tRNA-Glu-TTC-4-2 | 26 | -    | -    | 0.29 | -    | 0.33 | 0.43 |
| tRF-3 | tRNA-Gly-CCC-2-1 | 22 | -    | -    | -    | 0.13 | 0.41 | 0.15 |
| tRF-3 | tRNA-Gly-TCC-1-1 | 22 | -    | 0.26 | 0.48 | 0.29 | 1.29 | 0.60 |
| tRF-3 | tRNA-Gly-TCC-2-2 | 22 | -    | 0.26 | 0.48 | 0.29 | 1.29 | 0.61 |
| tRF-3 | tRNA-Gly-TCC-3-1 | 22 | -    | 0.26 | 0.48 | 0.29 | 1.29 | 0.60 |
| tRF-3 | tRNA-Leu-AAG-1-2 | 18 | -    | 0.19 | 0.40 | 0.29 | 0.67 | 0.34 |
| tRF-3 | tRNA-Leu-AAG-2-2 | 18 | -    | 0.19 | 0.40 | 0.29 | 0.67 | 0.34 |
| tRF-3 | tRNA-Leu-AAG-3-1 | 18 | -    | 0.18 | 0.38 | 0.28 | 0.64 | 0.32 |
| tRF-3 | tRNA-Leu-AAG-4-1 | 18 | -    | 0.18 | 0.38 | 0.28 | 0.64 | 0.33 |
| tRF-3 | tRNA-Leu-CAA-1-2 | 22 | -    | 0.14 | -    | 0.15 | 0.21 | 0.17 |
| tRF-3 | tRNA-Leu-CAA-2-1 | 22 | -    | 0.14 | -    | 0.15 | 0.21 | 0.17 |
| tRF-3 | tRNA-Leu-CAA-3-1 | 22 | -    | 0.14 | -    | 0.15 | 0.21 | 0.17 |
| tRF-3 | tRNA-Leu-CAA-4-1 | 22 | -    | 0.14 | -    | 0.15 | 0.23 | 0.16 |
| tRF-3 | tRNA-Leu-CAG-2-2 | 22 | -    | -    | -    | 0.15 | 0.20 | -    |
| tRF-3 | tRNA-Leu-TAG-1-1 | 18 | -    | 0.19 | 0.40 | 0.29 | 0.67 | 0.34 |
| tRF-3 | tRNA-Leu-TAG-3-1 | 18 | -    | 0.19 | 0.40 | 0.30 | 0.67 | 0.35 |
| tRF-3 | tRNA-Pro-AGG-1-1 | 22 | -    | 0.19 | 0.43 | 0.24 | 0.29 | 0.40 |
| tRF-3 | tRNA-Pro-AGG-2-3 | 22 | -    | 0.19 | 0.43 | 0.24 | 0.29 | 0.40 |
| tRF-3 | tRNA-Pro-AGG-3-1 | 22 | -    | 0.19 | 0.43 | 0.24 | 0.29 | 0.40 |
| tRF-3 | tRNA-Pro-CGG-1-1 | 22 | -    | 0.19 | 0.44 | 0.24 | 0.29 | 0.31 |
| tRF-3 | tRNA-Pro-CGG-2-1 | 22 | -    | 0.19 | 0.43 | 0.24 | 0.29 | 0.40 |
| tRF-3 | tRNA-Pro-TGG-1-1 | 22 | 0.08 | 0.24 | 0.56 | 0.27 | 0.36 | 0.33 |
| tRF-3 | tRNA-Pro-TGG-2-1 | 22 | -    | 0.19 | 0.43 | 0.24 | 0.29 | 0.40 |
| tRF-3 | tRNA-Pro-TGG-3-1 | 22 | 0.08 | 0.24 | 0.56 | 0.27 | 0.36 | 0.33 |
| tRF-3 | tRNA-Ser-AGA-1-1 | 18 | -    | -    | -    | -    | -    | 0.17 |
| tRF-3 | tRNA-Ser-AGA-2-5 | 18 | -    | -    | -    | -    | -    | 0.17 |
| tRF-3 | tRNA-Ser-AGA-3-1 | 18 | -    | -    | -    | -    | -    | 0.17 |
| tRF-3 | tRNA-Ser-AGA-4-1 | 18 | -    | -    | -    | -    | -    | 0.17 |
| tRF-3 | tRNA-Ser-GCT-3-1 | 18 | -    | -    | -    | -    | -    | 0.42 |
| tRF-3 | tRNA-Ser-GCT-3-1 | 22 | -    | 0.18 | 0.30 | 0.15 | 0.34 | -    |
| tRF-3 | tRNA-Ser-GCT-4-1 | 18 | -    | -    | -    | -    | -    | 0.42 |
| tRF-3 | tRNA-Ser-GCT-4-1 | 22 | -    | 0.18 | 0.30 | 0.15 | 0.34 | -    |
| tRF-3 | tRNA-Ser-GCT-5-1 | 18 | -    | -    | -    | -    | -    | 0.41 |
| tRF-3 | tRNA-Ser-GCT-5-1 | 22 | -    | 0.17 | 0.29 | 0.14 | 0.34 | -    |
| tRF-3 | tRNA-Ser-TGA-2-1 | 18 | -    | -    | -    | -    | -    | 0.17 |
| tRF-3 | tRNA-Ser-TGA-3-1 | 18 | -    | -    | -    | -    | -    | 0.17 |

|       |                       |    |       |       |       |       |      |      |
|-------|-----------------------|----|-------|-------|-------|-------|------|------|
| tRF-3 | tRNA-Ser-TGA-4-1      | 18 | 0.08  | 0.26  | 0.68  | 0.29  | 0.49 | 0.54 |
| tRF-3 | tRNA-Tyr-GTA-1-1      | 17 | -     | 0.12  | 0.32  | -     | 0.65 | 0.51 |
| tRF-3 | tRNA-Tyr-GTA-2-1      | 17 | -     | 0.43  | 1.18  | 0.67  | 2.28 | 1.36 |
| tRF-3 | tRNA-Tyr-GTA-3-1      | 17 | -     | -     | -     | -     | 0.58 | 0.17 |
| tRF-3 | tRNA-Tyr-GTA-5-2      | 17 | -     | 0.43  | 1.18  | 0.67  | 2.28 | 1.36 |
| tRF-3 | tRNA-Tyr-GTA-6-1      | 17 | -     | -     | -     | -     | 0.58 | 0.17 |
| tRF-3 | tRNA-Tyr-GTA-7-1      | 17 | -     | 0.33  | 0.98  | 0.57  | 2.05 | 0.88 |
| tRF-3 | tRNA-Tyr-GTA-8-1      | 17 | -     | 0.12  | 0.32  | -     | 0.65 | 0.51 |
| tRF-3 | tRNA-Val-AAC-1-5      | 17 | -     | -     | 2.39  | -     | 1.91 | 2.79 |
| tRF-3 | tRNA-Val-AAC-2-1      | 17 | 0.18  | 0.86  | 2.46  | 1.77  | 2.01 | 2.86 |
| tRF-3 | tRNA-Val-AAC-4-1      | 17 | -     | -     | 2.39  | -     | 1.91 | 2.79 |
| tRF-3 | tRNA-Val-AAC-chr6-84  | 17 | 0.16  | 0.75  | 2.24  | 1.63  | 1.69 | 2.64 |
| tRF-3 | tRNA-Val-CAC-1-6      | 17 | -     | -     | 2.38  | -     | 1.91 | 2.79 |
| tRF-3 | tRNA-Val-CAC-2-1      | 17 | -     | -     | -     | -     | 0.26 | 0.27 |
| tRF-3 | tRNA-Val-CAC-5-1      | 17 | -     | -     | 2.38  | -     | 1.91 | 2.79 |
| tRF-3 | tRNA-Val-TAC-1-2      | 22 | -     | -     | 0.42  | 0.36  | 0.38 | 0.58 |
| tRF-3 | tRNA-Val-TAC-2-1      | 22 | -     | -     | 0.42  | 0.36  | 0.38 | 0.58 |
| tRF-5 | tRNA-Tyr-GTA-chr1-125 | 32 | -     | 0.17  | 0.33  | 0.10  | 0.16 | 0.44 |
| tRF-5 | tRNA-Tyr-GTA-chr14-8  | 32 | -     | 0.17  | 0.33  | 0.10  | 0.16 | 0.44 |
| tRF-5 | tRNA-Ala-AGC-4-1      | 22 | -     | -     | -     | -     | -    | 0.16 |
| tRF-5 | tRNA-Ala-CGC-1-1      | 22 | -     | -     | -     | -     | -    | 0.17 |
| tRF-5 | tRNA-Ala-CGC-2-1      | 22 | -     | -     | -     | -     | -    | 0.17 |
| tRF-5 | tRNA-Ala-CGC-3-1      | 22 | -     | -     | -     | -     | -    | 0.15 |
| tRF-5 | tRNA-Ala-TGC-2-1      | 22 | -     | -     | -     | -     | -    | 0.17 |
| tRF-5 | tRNA-Ala-TGC-3-1      | 22 | -     | -     | -     | -     | -    | 0.17 |
| tRF-5 | tRNA-Ala-TGC-4-1      | 22 | -     | -     | -     | -     | -    | 0.15 |
| tRF-5 | tRNA-Asp-GTC-2-7      | 32 | 0.08  | -     | -     | -     | -    | -    |
| tRF-5 | tRNA-Gln-CTG-1-3      | 32 | 0.18  | -     | -     | -     | -    | -    |
| tRF-5 | tRNA-Gln-CTG-2-1      | 32 | 0.18  | -     | -     | -     | -    | -    |
| tRF-5 | tRNA-Gln-CTG-5-1      | 32 | 0.17  | -     | -     | -     | -    | -    |
| tRF-5 | tRNA-Gln-TTG-1-1      | 32 | 0.08  | -     | -     | -     | -    | -    |
| tRF-5 | tRNA-Gln-TTG-2-1      | 32 | 0.08  | -     | -     | -     | -    | -    |
| tRF-5 | tRNA-Glu-CTC-1-7      | 32 | 5.51  | 5.00  | -     | 9.44  | -    | -    |
| tRF-5 | tRNA-Glu-CTC-2-1      | 32 | 5.51  | 5.00  | -     | 9.44  | -    | -    |
| tRF-5 | tRNA-Glu-TTC-1-1      | 30 | -     | -     | -     | 0.08  | -    | 0.15 |
| tRF-5 | tRNA-Glu-TTC-1-1      | 32 | 0.06  | -     | -     | -     | -    | -    |
| tRF-5 | tRNA-Glu-TTC-2-2      | 32 | 0.27  | -     | -     | -     | -    | -    |
| tRF-5 | tRNA-Glu-TTC-3-1      | 32 | 0.65  | 0.45  | -     | -     | -    | -    |
| tRF-5 | tRNA-Glu-TTC-4-2      | 32 | 0.65  | 0.45  | -     | -     | -    | -    |
| tRF-5 | tRNA-Glu-TTC-8-1      | 32 | 0.65  | 0.44  | -     | 0.36  | -    | 0.27 |
| tRF-5 | tRNA-Gly-GCC-1-4      | 32 | 66.88 | 27.58 | 10.57 | 24.30 | 4.69 | 3.48 |
| tRF-5 | tRNA-His-GTG-1-6      | 29 | -     | 1.42  | 1.98  | 4.70  | 3.87 | 1.66 |
| tRF-5 | tRNA-iMet-CAT-1-2     | 31 | 1.06  | 2.10  | 0.59  | -     | -    | -    |
| tRF-5 | tRNA-iMet-CAT-2-1     | 31 | 1.06  | 2.10  | 0.59  | -     | -    | -    |

|           |                  |    |      |      |      |      |      |      |
|-----------|------------------|----|------|------|------|------|------|------|
| tRF-5     | tRNA-Leu-AAG-1-2 | 26 | -    | -    | -    | -    | 0.13 | 0.15 |
| tRF-5     | tRNA-Leu-AAG-2-2 | 26 | -    | -    | -    | -    | 0.13 | 0.15 |
| tRF-5     | tRNA-Leu-AAG-3-1 | 26 | -    | -    | -    | -    | 0.13 | 0.15 |
| tRF-5     | tRNA-Leu-CAG-1-7 | 26 | 0.15 | 1.00 | 1.18 | 0.57 | 0.87 | 0.85 |
| tRF-5     | tRNA-Leu-CAG-2-2 | 26 | 0.15 | 1.00 | 1.18 | 0.57 | 0.87 | 0.85 |
| tRF-5     | tRNA-Leu-TAG-1-1 | 26 | -    | -    | -    | -    | 0.13 | 0.15 |
| tRF-5     | tRNA-Lys-CTT-2-4 | 32 | 0.13 | 0.41 | 0.42 | -    | 0.33 | 0.27 |
| tRF-5     | tRNA-Lys-CTT-3-1 | 32 | 0.07 | 0.35 | 0.36 | 0.27 | 0.26 | 0.20 |
| tRF-5     | tRNA-Lys-CTT-4-1 | 32 | -    | 0.48 | -    | -    | -    | -    |
| tRF-5     | tRNA-Lys-TTT-3-3 | 32 | 0.57 | 1.70 | -    | -    | -    | -    |
| tRF-5     | tRNA-Lys-TTT-5-1 | 32 | 0.57 | 1.70 | -    | -    | -    | -    |
| tRF-5     | tRNA-Ser-AGA-1-1 | 23 | -    | -    | -    | -    | 0.13 | 0.26 |
| tRF-5     | tRNA-Ser-AGA-1-1 | 24 | -    | 0.20 | -    | -    | -    | -    |
| tRF-5     | tRNA-Ser-AGA-2-5 | 23 | -    | -    | -    | -    | 0.13 | 0.26 |
| tRF-5     | tRNA-Ser-AGA-2-5 | 24 | -    | 0.20 | -    | -    | -    | -    |
| tRF-5     | tRNA-Ser-AGA-3-1 | 23 | -    | -    | -    | -    | 0.13 | 0.26 |
| tRF-5     | tRNA-Ser-AGA-3-1 | 24 | -    | 0.20 | -    | -    | -    | -    |
| tRF-5     | tRNA-Ser-AGA-4-1 | 23 | -    | -    | -    | -    | -    | 0.23 |
| tRF-5     | tRNA-Ser-AGA-4-1 | 24 | -    | 0.18 | -    | -    | -    | -    |
| tRF-5     | tRNA-Ser-TGA-2-1 | 23 | -    | -    | -    | -    | 0.13 | 0.25 |
| tRF-5     | tRNA-Ser-TGA-2-1 | 24 | -    | 0.20 | -    | -    | -    | -    |
| tRF-5     | tRNA-Ser-TGA-3-1 | 23 | -    | -    | -    | -    | 0.13 | 0.25 |
| tRF-5     | tRNA-Ser-TGA-3-1 | 24 | -    | 0.20 | -    | -    | -    | -    |
| tRF-5     | tRNA-Ser-TGA-4-1 | 23 | -    | -    | -    | -    | 0.13 | 0.25 |
| tRF-5     | tRNA-Ser-TGA-4-1 | 24 | -    | 0.20 | -    | -    | -    | -    |
| tRF-5     | tRNA-Val-AAC-1-5 | 32 | 1.56 | 3.72 | 2.28 | 4.23 | 1.81 | 2.36 |
| tRF-5     | tRNA-Val-AAC-2-1 | 23 | -    | -    | 0.32 | -    | -    | -    |
| tRF-5     | tRNA-Val-AAC-3-1 | 32 | 1.56 | 3.72 | 2.28 | 4.23 | 1.81 | 2.36 |
| tRF-5     | tRNA-Val-AAC-4-1 | 32 | 1.56 | 3.72 | 2.28 | 4.23 | 1.81 | 2.36 |
| tRF-5     | tRNA-Val-AAC-5-1 | 23 | 0.16 | 0.54 | 1.03 | 0.62 | 1.00 | 0.83 |
| tRF-5     | tRNA-Val-CAC-1-6 | 32 | 1.71 | 3.75 | 2.32 | 4.36 | 1.83 | 2.39 |
| tRF-5     | tRNA-Val-CAC-2-1 | 32 | 0.35 | 0.41 | -    | -    | -    | -    |
| tRF-5     | tRNA-Val-CAC-4-1 | 32 | 1.71 | 3.75 | 2.32 | 4.36 | 1.83 | 2.39 |
| tRF-5     | tRNA-Val-CAC-5-1 | 32 | 1.70 | 3.75 | 2.32 | 4.36 | 1.83 | 2.39 |
| tRF-5     | tRNA-Val-TAC-1-2 | 31 | -    | 0.14 | -    | -    | -    | -    |
| tRF-novel | tRNA-Asp-GTC-1-1 | 22 | -    | 0.15 | -    | -    | 0.36 | -    |
| tRF-novel | tRNA-Asp-GTC-4-1 | 22 | -    | 0.15 | -    | -    | 0.35 | -    |
| tRF-novel | tRNA-Asp-GTC-5-1 | 19 | -    | -    | -    | 0.08 | -    | -    |
| tRF-novel | tRNA-Gln-CTG-1-3 | 20 | -    | 1.16 | 2.25 | -    | 2.37 | 1.66 |
| tRF-novel | tRNA-Gln-CTG-2-1 | 20 | -    | 1.16 | 2.24 | -    | 2.38 | 1.66 |
| tRF-novel | tRNA-Gln-CTG-3-2 | 19 | 0.18 | -    | -    | -    | -    | -    |
| tRF-novel | tRNA-Gln-CTG-3-2 | 20 | -    | 0.96 | 1.72 | -    | 1.94 | 1.21 |
| tRF-novel | tRNA-Gln-CTG-4-1 | 19 | 0.18 | -    | -    | -    | -    | -    |
| tRF-novel | tRNA-Gln-CTG-4-1 | 20 | -    | 0.96 | 1.69 | -    | 1.94 | 1.20 |
| tRF-novel | tRNA-Gln-CTG-5-1 | 23 | -    | -    | 0.41 | -    | -    | -    |

|           |                   |    |      |      |      |      |      |      |
|-----------|-------------------|----|------|------|------|------|------|------|
| tRF-novel | tRNA-Gln-CTG-5-1  | 26 | -    | -    | -    | -    | -    | 0.21 |
| tRF-novel | tRNA-Gln-CTG-6-1  | 19 | 0.19 | -    | -    | -    | -    | -    |
| tRF-novel | tRNA-Gln-CTG-6-1  | 20 | -    | 1.01 | 1.77 | -    | 1.96 | 1.22 |
| tRF-novel | tRNA-Gln-TTG-1-1  | 19 | 0.21 | 0.68 | 1.19 | 0.68 | 1.18 | -    |
| tRF-novel | tRNA-Gln-TTG-1-1  | 22 | -    | -    | -    | -    | -    | 0.61 |
| tRF-novel | tRNA-Gln-TTG-2-1  | 18 | -    | 0.19 | 0.39 | -    | -    | 0.38 |
| tRF-novel | tRNA-Gln-TTG-2-1  | 22 | -    | -    | -    | -    | 0.25 | -    |
| tRF-novel | tRNA-Gln-TTG-3-1  | 19 | 0.18 | 0.67 | 1.18 | 0.64 | 1.17 | -    |
| tRF-novel | tRNA-Gln-TTG-3-1  | 22 | -    | -    | -    | -    | -    | 0.61 |
| tRF-novel | tRNA-Glu-CTC-1-7  | 32 | -    | -    | 2.04 | -    | 2.15 | 1.51 |
| tRF-novel | tRNA-Glu-CTC-2-1  | 32 | -    | -    | 2.04 | -    | 2.37 | 1.54 |
| tRF-novel | tRNA-Gly-GCC-2-3  | 20 | -    | -    | 1.00 | -    | 1.24 | 0.98 |
| tRF-novel | tRNA-Gly-GCC-2-3  | 22 | -    | 0.64 | -    | -    | -    | -    |
| tRF-novel | tRNA-Gly-GCC-2-3  | 24 | 0.13 | -    | -    | -    | -    | -    |
| tRF-novel | tRNA-Gly-GCC-3-1  | 20 | -    | -    | 1.01 | -    | 1.24 | 0.98 |
| tRF-novel | tRNA-Gly-GCC-3-1  | 22 | -    | 0.64 | -    | -    | -    | -    |
| tRF-novel | tRNA-Gly-GCC-3-1  | 24 | 0.13 | -    | -    | -    | -    | -    |
| tRF-novel | tRNA-Gly-GCC-5-1  | 20 | -    | -    | -    | -    | -    | 0.29 |
| tRF-novel | tRNA-Gly-GCC-5-1  | 21 | -    | -    | -    | 0.42 | -    | -    |
| tRF-novel | tRNA-Gly-GCC-5-1  | 22 | -    | 0.33 | -    | -    | -    | -    |
| tRF-novel | tRNA-Gly-GCC-5-1  | 24 | 0.13 | -    | -    | -    | -    | -    |
| tRF-novel | tRNA-iMet-CAT-1-2 | 18 | -    | -    | -    | -    | 0.75 | -    |
| tRF-novel | tRNA-iMet-CAT-1-2 | 31 | -    | -    | -    | -    | -    | 0.33 |
| tRF-novel | tRNA-iMet-CAT-2-1 | 18 | -    | -    | -    | -    | 0.73 | -    |
| tRF-novel | tRNA-iMet-CAT-2-1 | 31 | -    | -    | -    | -    | -    | 0.33 |
| tRF-novel | tRNA-Lys-CTT-1-2  | 32 | -    | 0.57 | 0.53 | 0.41 | 0.51 | 0.35 |
| tRF-novel | tRNA-Lys-CTT-4-1  | 32 | -    | -    | 0.48 | 0.37 | 0.45 | 0.31 |
| tRF-novel | tRNA-Lys-CTT-6-1  | 17 | -    | 0.33 | 0.54 | -    | 0.54 | 0.36 |
| tRF-novel | tRNA-Lys-CTT-6-1  | 21 | 0.13 | -    | -    | -    | -    | -    |
| tRF-novel | tRNA-Lys-TTT-3-3  | 20 | -    | -    | 0.75 | -    | -    | 0.77 |
| tRF-novel | tRNA-Lys-TTT-3-3  | 32 | -    | -    | -    | -    | 0.58 | -    |
| tRF-novel | tRNA-Lys-TTT-4-1  | 20 | -    | 0.42 | 0.53 | 0.51 | 0.59 | 0.54 |
| tRF-novel | tRNA-Lys-TTT-4-1  | 21 | 0.33 | -    | -    | -    | -    | -    |
| tRF-novel | tRNA-Lys-TTT-5-1  | 20 | -    | -    | 0.75 | -    | -    | 0.78 |
| tRF-novel | tRNA-Lys-TTT-5-1  | 32 | -    | -    | -    | -    | 0.59 | -    |
| tRF-novel | tRNA-Lys-TTT-6-1  | 20 | -    | 0.37 | 0.48 | 0.47 | 0.55 | 0.47 |
| tRF-novel | tRNA-Lys-TTT-6-1  | 21 | 0.32 | -    | -    | -    | -    | -    |
| tRF-novel | tRNA-Met-CAT-2-1  | 21 | -    | -    | -    | -    | 0.21 | 0.12 |
| tRF-novel | tRNA-Met-CAT-3-2  | 21 | -    | -    | -    | -    | 0.22 | 0.12 |
| tRF-novel | tRNA-Met-CAT-4-3  | 21 | -    | -    | -    | -    | 0.21 | 0.12 |
| tRF-novel | tRNA-Met-CAT-5-1  | 21 | -    | -    | -    | -    | 0.20 | 0.12 |
| tRF-novel | tRNA-Thr-CGT-6-1  | 18 | -    | -    | -    | -    | 0.30 | 0.20 |
| tRF-novel | tRNA-Val-CAC-2-1  | 18 | -    | -    | 0.61 | -    | -    | 0.33 |
| tRF-novel | tRNA-Val-CAC-6-1  | 18 | -    | 0.14 | 0.43 | -    | 0.20 | 0.20 |
| tRF-novel | tRNA-Val-CAC-6-1  | 20 | 0.22 | -    | -    | 0.33 | -    | -    |

|           |                  |    |      |   |   |   |   |   |
|-----------|------------------|----|------|---|---|---|---|---|
| tRF-novel | tRNA-Val-TAC-1-2 | 21 | 0.34 | - | - | - | - | - |
| tRF-novel | tRNA-Val-TAC-2-1 | 17 | 0.08 | - | - | - | - | - |

---

Values are for percent average expression in tRF levels as calculated with tRF2Cancer. Treatments: A, ANG; R, RNase 1; U, Untreated. All tRFs were identified in at least 2 of 3 biological replicates.



**TABLE S3.** tRNAs with differential levels

| tRNA Name        | $\Delta RNH1$ A/R | $\Delta RNH1$ A/U | WT A/R   | WT A/U   |
|------------------|-------------------|-------------------|----------|----------|
| Tyr-GTA-chr10-3  | -                 | -                 | -        | -4.87133 |
| Tyr-GTA-chr1-125 | -2.84739          | -5.87496          | -2.7248  | -2.92902 |
| Tyr-GTA-chr14-8  | -2.88621          | -5.91918          | -2.74293 | -2.94326 |
| Tyr-GTA-chr21-2  | -2.84739          | -5.87496          | -2.7248  | -2.92902 |
| Tyr-GTA-chr2-12  | -                 | -                 | -5.33511 | -        |
| Tyr-GTA-chr9-10  | -                 | -6.21221          | -        | -        |
| Tyr-GTA-chr9-4   | -                 | -4.9163           | -6.25643 | -5.54804 |
| Gln-TTG-6-1      | -4.03757          | -5.81164          | -2.97997 | -2.52093 |
| Gln-TTG-9-1      | -                 | 0                 | -        | -6.5197  |
| Leu-TAA-1-1      | -                 | -5.83236          | -        | -        |
| Leu-TAA-4-1      | -3.3889           | -6.27025          | -        | -1.74909 |
| Ala-AGC-1-1      | -                 | -                 | -        | -5.4994  |
| Ala-AGC-4-1      | -                 | -                 | -        | -3.75695 |
| Ala-AGC-8-1      | -3.16365          | -                 | -        | -        |
| Ala-AGC-8-2      | -3.16365          | -                 | -        | -        |
| Ala-CGC-3-1      | -                 | -3.70617          | -2.81208 | -        |
| Ala-CGC-4-1      | -                 | -                 | -        | -3.91345 |
| Ala-CGC-5-1      | -                 | 0                 | -        | -4.80576 |
| Ala-TGC-3-1      | -                 | -                 | -        | -4.88762 |
| Ala-TGC-3-2      | -                 | -                 | -        | -4.88762 |
| Ala-TGC-4-1      | -                 | -2.8163           | -3.84068 | -5.38585 |
| Ala-TGC-5-1      | -                 | -                 | -        | -3.64791 |
| Ala-TGC-6-1      | -                 | -3.18095          | -3.80565 | -5.40732 |
| Ala-TGC-7-1      | -                 | -                 | -        | -3.64791 |
| Arg-ACG-1-1      | -2.74799          | -4.94213          | -3.85961 | -2.70908 |
| Arg-ACG-1-2      | -2.74799          | -4.94213          | -3.85961 | -2.70908 |
| Arg-ACG-1-3      | -2.74799          | -4.94213          | -3.85961 | -2.70908 |
| Arg-ACG-2-1      | -1.66102          | -4.02698          | -        | -        |
| Arg-ACG-2-2      | -1.66102          | -4.02698          | -        | -        |
| Arg-ACG-2-3      | -1.66102          | -4.02698          | -        | -        |
| Arg-ACG-2-4      | -1.66102          | -4.02698          | -        | -        |
| Arg-CCG-1-1      | -                 | -                 | -6.49877 | -6.04571 |
| Arg-CCG-1-2      | -                 | -                 | -6.49877 | -6.04571 |
| Arg-CCG-1-3      | -                 | -                 | -6.49877 | -6.04571 |
| Arg-CCG-2-1      | -3.57593          | -2.71029          | -        | -        |
| Arg-CCT-1-1      | -2.97442          | -3.38158          | -4.2399  | -5.01787 |
| Arg-CCT-2-1      | -2.90074          | -2.93241          | -4.08597 | -5.27897 |
| Arg-CCT-3-1      | -2.72708          | -4.7063           | -4.7801  | -3.63992 |
| Arg-CCT-4-1      | -2.914            | -3.7982           | -4.92207 | -3.64284 |
| Arg-TCT-2-1      | -1.353            | -                 | -        | -        |
| Arg-TCT-3-1      | -2.30423          | -3.98003          | -2.38368 | -2.46517 |
| Arg-TCT-5-1      | -2.83725          | -4.02529          | -2.69144 | -2.52392 |

|                 |          |          |          |          |
|-----------------|----------|----------|----------|----------|
| Asn-GTT-10-1    | -3.38862 | -5.21624 | -        | -        |
| Asn-GTT-1-1     | -2.38239 | -4.33996 | -        | -        |
| Asn-GTT-17-1    | -        | -4.01939 | 0        | 0        |
| Asn-GTT-2-1     | -3.14037 | -4.63759 | -2.94271 | -2.83827 |
| Asn-GTT-2-2     | -3.14037 | -4.63759 | -2.94271 | -2.83827 |
| Asn-GTT-2-3     | -3.14037 | -4.63759 | -2.94271 | -2.83827 |
| Asn-GTT-2-4     | -3.14037 | -4.63759 | -2.94271 | -2.83827 |
| Asn-GTT-2-5     | -3.14037 | -4.63759 | -2.94271 | -2.83827 |
| Asn-GTT-2-6     | -3.14037 | -4.63759 | -2.94271 | -2.83827 |
| Asn-GTT-3-1     | -2.41427 | -4.53507 | -2.49934 | -        |
| Asn-GTT-3-2     | -2.41427 | -4.53507 | -2.49934 | -        |
| Asn-GTT-4-1     | -        | -3.86388 | -        | -        |
| Asn-GTT-6-1     | -3.93791 | -5.12842 | -        | -2.84623 |
| Asp-GTC-3-1     | -        | -        | -2.87834 | -2.28779 |
| Cys-GCA-1-1     | 2.087495 | -        | -        | -        |
| Cys-GCA-11-1    | -        | -4.87899 | -        | -        |
| Cys-GCA-17-1    | -        | -5.23799 | -        | -        |
| Cys-GCA-20-1    | -        | 0        | -        | -4.14926 |
| Cys-GCA-2-1     | -1.01681 | -        | -        | -        |
| Cys-GCA-21-1    | -        | -5.89673 | -        | -        |
| Cys-GCA-2-2     | -1.01681 | -        | -        | -        |
| Cys-GCA-2-3     | -1.01681 | -        | -        | -        |
| Cys-GCA-23-1    | -        | -5.43444 | -        | -        |
| Cys-GCA-2-4     | -1.01681 | -        | -        | -        |
| Cys-GCA-24-1    | -        | -5.6477  | -        | -        |
| Cys-GCA-25-1    | -        | -5.94361 | -        | -        |
| Cys-GCA-4-1     | -0.99468 | -        | -        | -        |
| Cys-GCA-5-1     | -1.89197 | -2.60543 | -        | -        |
| Cys-GCA-7-1     | -        | -3.99027 | -        | -        |
| Cys-GCA-8-1     | -        | -2.42271 | -        | -        |
| Gln-CTG-1-1     | -        | -2.47142 | -1.72353 | -1.57616 |
| Gln-CTG-1-2     | -        | -2.47142 | -1.72353 | -1.57616 |
| Gln-CTG-1-3     | -        | -2.47142 | -1.72353 | -1.57616 |
| Gln-CTG-1-4     | -        | -2.47142 | -1.72353 | -1.57616 |
| Gln-CTG-1-5     | -        | -2.47142 | -1.72353 | -1.57616 |
| Gln-CTG-2-1     | -        | -2.47849 | -1.72093 | -1.56977 |
| Gln-CTG-3-1     | -4.1867  | -6.77468 | -2.70031 | -2.8208  |
| Gln-CTG-3-2     | -4.1867  | -6.77468 | -2.70031 | -2.8208  |
| Gln-CTG-4-1     | -1.77264 | -4.5221  | -2.449   | -2.59942 |
| Gln-CTG-4-2     | -1.77264 | -4.5221  | -2.449   | -2.59942 |
| Gln-CTG-6-1     | -3.94191 | -6.56684 | -2.50382 | -2.70527 |
| Gln-CTG-7-1     | 3.807028 | -        | -        | -        |
| Gln-CTG-chr19-4 | -        | -5.8547  | -        | -5.24018 |
| Gln-TTG-1-1     | -        | -3.4299  | -2.23288 | -2.21515 |
| Gln-TTG-2-1     | -        | -2.48766 | -2.47785 | -2.54207 |

|              |          |          |          |          |
|--------------|----------|----------|----------|----------|
| Gln-TTG-3-1  | -2.50934 | -5.41082 | -2.22001 | -2.24104 |
| Gln-TTG-3-2  | -2.50934 | -5.41082 | -2.22001 | -2.24104 |
| Gln-TTG-3-3  | -2.50934 | -5.41082 | -2.22001 | -2.24104 |
| Glu-CTC-1-1  | 0.526727 | -        | -0.55372 | -0.63347 |
| Glu-CTC-1-2  | 0.526727 | -        | -0.55372 | -0.63347 |
| Glu-CTC-1-3  | 0.526727 | -        | -0.55372 | -0.63347 |
| Glu-CTC-1-4  | 0.526727 | -        | -0.55372 | -0.63347 |
| Glu-CTC-1-5  | 0.526727 | -        | -0.55372 | -0.63347 |
| Glu-CTC-1-6  | 0.526727 | -        | -0.55372 | -0.63347 |
| Glu-CTC-1-7  | 0.526727 | -        | -0.55372 | -0.63347 |
| Glu-CTC-2-1  | 0.527545 | -        | -0.54934 | -0.62824 |
| Glu-CTC-5-1  | -        | -        | -4.56486 | -4.73422 |
| Glu-TTC-10-1 | -        | -2.90076 | -3.23469 | -2.61027 |
| Glu-TTC-1-1  | -        | -        | -1.80243 | -        |
| Glu-TTC-1-2  | -        | -        | -1.80243 | -        |
| Glu-TTC-2-1  | 1.405875 | -        | -        | -        |
| Glu-TTC-2-2  | 1.405875 | -        | -        | -        |
| Glu-TTC-3-1  | 1.734595 | 1.528142 | -        | -        |
| Glu-TTC-4-1  | 1.715924 | 1.474512 | -        | -        |
| Glu-TTC-4-2  | 1.715924 | 1.474512 | -        | -        |
| Glu-TTC-8-1  | 1.751555 | 1.573552 | -        | -        |
| Glu-TTC-9-1  | -        | -        | -3.61911 | -2.70689 |
| Gly-CCC-1-1  | -        | -        | -0.711   | -        |
| Gly-CCC-1-2  | -        | -        | -0.711   | -        |
| Gly-CCC-2-1  | -1.57105 | -2.30654 | -        | -        |
| Gly-CCC-2-2  | -1.57105 | -2.30654 | -        | -        |
| Gly-CCC-5-1  | -        | -        | -2.61238 | -        |
| Gly-CCC-6-1  | -4.52526 | -7.67051 | -2.64083 | -2.14447 |
| Gly-CCC-7-1  | -        | -4.26859 | -        | -4.3871  |
| Gly-GCC-1-1  | 0.595762 | -        | -        | -        |
| Gly-GCC-1-2  | 0.595762 | -        | -        | -        |
| Gly-GCC-1-3  | 0.595762 | -        | -        | -        |
| Gly-GCC-1-4  | 0.595762 | -        | -        | -        |
| Gly-GCC-1-5  | 0.595762 | -        | -        | -        |
| Gly-GCC-2-1  | -        | -0.29743 | -        | -        |
| Gly-GCC-2-2  | -        | -0.29743 | -        | -        |
| Gly-GCC-2-3  | -        | -0.29743 | -        | -        |
| Gly-GCC-2-4  | -        | -0.29743 | -        | -        |
| Gly-GCC-2-5  | -        | -0.29743 | -        | -        |
| Gly-GCC-2-6  | -        | -0.29743 | -        | -        |
| Gly-GCC-3-1  | -        | -0.29507 | -        | -        |
| Gly-GCC-5-1  | -        | -        | 0.411541 | -        |
| Gly-TCC-1-1  | -        | -        | -2.45662 | -        |
| Gly-TCC-2-1  | -1.05364 | -3.0875  | -2.2854  | -2.43261 |
| Gly-TCC-2-2  | -1.05364 | -3.0875  | -2.2854  | -2.43261 |

|             |          |          |          |          |
|-------------|----------|----------|----------|----------|
| Gly-TCC-2-3 | -1.05364 | -3.0875  | -2.2854  | -2.43261 |
| Gly-TCC-2-4 | -1.05364 | -3.0875  | -2.2854  | -2.43261 |
| Gly-TCC-2-5 | -1.05364 | -3.0875  | -2.2854  | -2.43261 |
| Gly-TCC-2-6 | -1.05364 | -3.0875  | -2.2854  | -2.43261 |
| Gly-TCC-3-1 | -        | -1.87289 | -        | -        |
| Gly-TCC-4-1 | -        | -5.67056 | -        | -        |
| His-GTG-1-1 | -        | -        | -0.9771  | -        |
| His-GTG-1-2 | -        | -        | -0.9771  | -        |
| His-GTG-1-3 | -        | -        | -0.9771  | -        |
| His-GTG-1-4 | -        | -        | -0.9771  | -        |
| His-GTG-1-5 | -        | -        | -0.9771  | -        |
| His-GTG-1-6 | -        | -        | -0.9771  | -        |
| His-GTG-1-7 | -        | -        | -0.9771  | -        |
| His-GTG-1-8 | -        | -        | -0.9771  | -        |
| His-GTG-1-9 | -        | -        | -0.9771  | -        |
| His-GTG-2-1 | -        | -3.05468 | -        | -        |
| Ile-AAT-2-1 | -        | -5.6513  | -        | -        |
| Ile-AAT-3-1 | -        | -5.6513  | -        | -        |
| Ile-AAT-4-1 | -        | -4.78252 | -3.73081 | -5.04677 |
| Ile-AAT-5-1 | -        | -5.78252 | -        | -        |
| Ile-AAT-5-2 | -        | -5.78252 | -        | -        |
| Ile-AAT-5-3 | -        | -5.78252 | -        | -        |
| Ile-AAT-5-4 | -        | -5.78252 | -        | -        |
| Ile-AAT-5-5 | -        | -5.78252 | -        | -        |
| Ile-AAT-6-1 | -        | 0        | -4.77731 | -5.31357 |
| Ile-AAT-8-1 | -3.03752 | -5.42197 | -        | -        |
| Ile-AAT-9-1 | -        | -        | -        | -4.56285 |
| Ile-TAT-1-1 | -        | -3.53551 | -        | 0        |
| Ile-TAT-2-3 | -        | -3.53551 | -        | 0        |
| Leu-AAG-1-1 | -1.97216 | -        | -        | -        |
| Leu-AAG-1-2 | -1.97216 | -        | -        | -        |
| Leu-AAG-1-3 | -1.97216 | -        | -        | -        |
| Leu-AAG-2-1 | -1.96557 | -        | -        | -        |
| Leu-AAG-2-2 | -1.96557 | -        | -        | -        |
| Leu-AAG-2-3 | -1.96557 | -        | -        | -        |
| Leu-AAG-2-4 | -1.96557 | -        | -        | -        |
| Leu-AAG-3-1 | -1.96557 | -        | -        | -        |
| Leu-CAA-1-1 | -2.08231 | -3.8873  | -3.56686 | -4.32631 |
| Leu-CAA-1-2 | -2.12699 | -3.94946 | -3.16643 | -4.1876  |
| Leu-CAA-2-1 | -2.13368 | -4.01688 | -2.49639 | -3.90116 |
| Leu-CAA-3-1 | -2.06275 | -3.83784 | -        | -3.45589 |
| Leu-CAA-4-1 | -2.00092 | -4.06073 | -3.2061  | -4.31379 |
| Leu-TAA-1-1 | 1.534311 | -        | -        | -        |
| Leu-TAA-3-1 | -        | -3.54277 | -4.3062  | -5.48883 |
| Leu-TAA-4-1 | 1.892357 | -        | 0        | 0        |

|                 |          |          |          |          |
|-----------------|----------|----------|----------|----------|
| Leu-TAG-1-1     | -1.90925 | -        | -        | -        |
| Leu-TAG-2-1     | 1.184648 | -        | -        | -        |
| Leu-TAG-3-1     | -        | -        | -3.39643 | -3.49197 |
| Lys-CTT-10-1    | -        | -        | -4.77731 | -        |
| Lys-CTT-1-1     | -        | -0.9831  | 1.494161 | 1.715847 |
| Lys-CTT-11-1    | -3.73159 | -6.07767 | -4.64839 | -4.39485 |
| Lys-CTT-1-2     | -        | -0.9831  | 1.494161 | 1.715847 |
| Lys-CTT-2-1     | -        | -1.16184 | 2.685364 | 2.172222 |
| Lys-CTT-2-2     | -        | -1.16184 | 2.685364 | 2.172222 |
| Lys-CTT-2-3     | -        | -1.16184 | 2.685364 | 2.172222 |
| Lys-CTT-2-4     | -        | -1.16184 | 2.685364 | 2.172222 |
| Lys-CTT-2-5     | -        | -1.16184 | 2.685364 | 2.172222 |
| Lys-CTT-3-1     | -2.99274 | -3.27634 | -2.29151 | -        |
| Lys-CTT-4-1     | -        | -0.92587 | 1.747432 | 1.943258 |
| Lys-CTT-5-1     | -        | -2.53749 | -        | -        |
| Lys-CTT-6-1     | -4.34442 | -7.53133 | -3.95648 | -4.23472 |
| Lys-CTT-7-1     | -        | -2.73505 | -        | -        |
| Lys-CTT-8-1     | -        | -2.16739 | -        | -        |
| Lys-CTT-chr15-5 | 0        | 0        | -5.87359 | -4.64518 |
| Lys-CTT-chr7-30 | -        | -5.40885 | -8.55701 | -7.28096 |
| Lys-TTT-1-1     | -        | -3.06257 | -        | -        |
| Lys-TTT-14-1    | -        | -        | -7.00079 | -6.16658 |
| Lys-TTT-2-1     | -        | -3.06928 | -        | -        |
| Lys-TTT-3-1     | -1.1947  | -        | -        | -        |
| Lys-TTT-3-2     | -1.1947  | -        | -        | -        |
| Lys-TTT-3-3     | -1.1947  | -        | -        | -        |
| Lys-TTT-3-4     | -1.1947  | -        | -        | -        |
| Lys-TTT-3-5     | -1.1947  | -        | -        | -        |
| Lys-TTT-4-1     | -1.20819 | -2.152   | -2.50242 | -3.01758 |
| Lys-TTT-5-1     | -1.20138 | -        | -        | -        |
| Lys-TTT-6-1     | -        | -        | -2.56562 | -2.48742 |
| Lys-TTT-7-1     | -1.59498 | -        | -2.76709 | -4.59281 |
| Lys-TTT-8-1     | 1.527709 | -        | -        | -        |
| Lys-TTT-9-1     | -        | -4.67056 | -7.11426 | -7.00816 |
| Met-CAT-1-1     | -2.39592 | -3.52847 | -2.68089 | -2.72254 |
| Met-CAT-2-1     | -        | -        | -        | -4.02769 |
| Met-CAT-4-1     | -        | -        | -        | -4.02769 |
| Met-CAT-4-2     | -        | -        | -        | -4.02769 |
| Met-CAT-4-3     | -        | -        | -        | -4.02769 |
| Met-CAT-5-1     | -        | -        | -        | -3.99376 |
| Met-CAT-6-1     | -2.30853 | -3.21335 | -        | -        |
| Phe-GAA-1-1     | -2.9256  | -4.97001 | -        | -2.92443 |
| Phe-GAA-1-2     | -2.9256  | -4.97001 | -        | -2.92443 |
| Phe-GAA-1-3     | -2.9256  | -4.97001 | -        | -2.92443 |
| Phe-GAA-1-4     | -2.9256  | -4.97001 | -        | -2.92443 |

|             |          |          |          |          |
|-------------|----------|----------|----------|----------|
| Phe-GAA-1-5 | -2.9256  | -4.97001 | -        | -2.92443 |
| Phe-GAA-1-6 | -2.9256  | -4.97001 | -        | -2.92443 |
| Phe-GAA-2-1 | -2.89596 | -5.13445 | -        | -2.95498 |
| Phe-GAA-3-1 | -        | -4.64224 | -3.2557  | -3.29209 |
| Phe-GAA-5-1 | -        | -5.77334 | -5.16742 | -6.47032 |
| Pro-AGG-2-1 | -        | -        | -2.25965 | -        |
| Pro-AGG-2-2 | -        | -        | -2.25965 | -        |
| Pro-AGG-2-3 | -        | -        | -2.25965 | -        |
| Pro-AGG-2-4 | -        | -        | -2.25965 | -        |
| Pro-AGG-2-5 | -        | -        | -2.25965 | -        |
| Pro-AGG-2-6 | -        | -        | -2.25965 | -        |
| Pro-AGG-2-7 | -        | -        | -2.25965 | -        |
| Pro-AGG-2-8 | -        | -        | -2.25965 | -        |
| Pro-TGG-1-1 | -3.96671 | -5.46154 | -3.06563 | -2.98239 |
| Pro-TGG-3-1 | -        | -        | -2.26255 | -        |
| Pro-TGG-3-2 | -        | -        | -2.26255 | -        |
| Pro-TGG-3-3 | -        | -        | -2.26255 | -        |
| Pro-TGG-3-4 | -        | -        | -2.26255 | -        |
| Pro-TGG-3-5 | -        | -        | -2.26255 | -        |
| SeC-TCA-2-1 | -        | -        | -        | -3.04198 |
| Ser-AGA-4-1 | -2.55139 | -4.37715 | -3.73567 | -4.61312 |
| Ser-CGA-1-1 | 3.287595 | -        | -        | -        |
| Ser-CGA-2-1 | 3.285537 | -        | -        | -        |
| Ser-CGA-3-1 | 4.411013 | -        | -        | -        |
| Ser-CGA-4-1 | -        | -        | -3.69289 | -3.38046 |
| Ser-GCT-1-1 | 3.896844 | -        | -        | -        |
| Ser-GCT-2-1 | 3.897154 | -        | -        | -        |
| Ser-GCT-3-1 | 3.789298 | -        | -        | -        |
| Ser-GCT-4-1 | 3.743573 | -        | -        | -        |
| Ser-GCT-4-2 | 3.743573 | -        | -        | -        |
| Ser-GCT-4-3 | 3.743573 | -        | -        | -        |
| Ser-GCT-5-1 | 3.934759 | -        | -        | -        |
| Ser-GCT-6-1 | -2.00766 | -4.93301 | -        | -        |
| Ser-TGA-1-1 | -        | -        | -3.77731 | -3.96542 |
| Sup-TTA-1-1 | -2.56782 | -5.51812 | -        | -        |
| Thr-AGT-2-1 | -        | -5.45035 | -4.88888 | -4.6536  |
| Thr-AGT-2-2 | -        | -5.45035 | -4.88888 | -4.6536  |
| Thr-AGT-3-1 | -        | -4.57914 | -4.52735 | -4.19873 |
| Thr-AGT-4-1 | -        | -        | -5.70601 | -6.29743 |
| Thr-AGT-5-1 | -        | -        | -6.8131  | -6.08453 |
| Thr-AGT-6-1 | -        | -5.45035 | -4.77174 | -4.6536  |
| Thr-CGT-3-1 | -        | -5.45035 | -4.28061 | -4.12851 |
| Thr-TGT-2-1 | -        | -        | -3.19235 | -        |
| Thr-TGT-3-1 | -        | -        | -        | -3.96542 |
| Thr-TGT-4-1 | -        | -2.89558 | -        | -        |

|              |          |          |          |          |
|--------------|----------|----------|----------|----------|
| Thr-TGT-5-1  | -2.27964 | -3.31719 | -        | -        |
| Thr-TGT-6-1  | -        | -2.24326 | -        | -        |
| Trp-CCA-1-1  | -        | -        | -        | -4.33418 |
| Trp-CCA-3-1  | -        | -        | -        | -3.59722 |
| Trp-CCA-3-2  | -        | -        | -        | -3.59722 |
| Trp-CCA-3-3  | -        | -        | -        | -3.59722 |
| Tyr-GTA-1-1  | -        | -6.46733 | -7.23661 | -6.54804 |
| Tyr-GTA-3-1  | -5.74764 | -7.63914 | -5.16308 | -5.93971 |
| Tyr-GTA-4-1  | -        | -        | -5.37052 | -3.67405 |
| Tyr-GTA-5-1  | -        | -2.78282 | -5.33387 | -4.22301 |
| Tyr-GTA-5-2  | -        | -4.65906 | -        | -        |
| Tyr-GTA-5-3  | -        | -2.87439 | -5.24219 | -        |
| Tyr-GTA-5-4  | -        | -2.87439 | -4.66195 | -        |
| Tyr-GTA-5-5  | -        | -2.87439 | -5.03428 | -4.93234 |
| Tyr-GTA-6-1  | -        | -2.50943 | -4.95075 | -4.662   |
| Tyr-GTA-7-1  | -        | -        | -5.37052 | -3.30521 |
| Tyr-GTA-8-1  | -        | -3.53551 | -4.83117 | -5.61011 |
| Val-AAC-1-1  | -0.5647  | 0.604749 | -0.6896  | -0.8064  |
| Val-AAC-1-2  | -0.5647  | 0.604749 | -0.6896  | -0.8064  |
| Val-AAC-1-3  | -0.5647  | 0.604749 | -0.6896  | -0.8064  |
| Val-AAC-1-4  | -0.5647  | 0.604749 | -0.6896  | -0.8064  |
| Val-AAC-1-5  | -0.5647  | 0.604749 | -0.6896  | -0.8064  |
| Val-AAC-2-1  | -1.52364 | -        | -1.33314 | -        |
| Val-AAC-3-1  | -0.5647  | 0.605364 | -0.6891  | -0.80594 |
| Val-AAC-4-1  | -0.56466 | 0.606216 | -0.68901 | -0.80599 |
| Val-CAC-10-1 | -        | -        | -4.83456 | -4.14926 |
| Val-CAC-1-1  | -0.35309 | -        | 0.339328 | -        |
| Val-CAC-11-1 | -        | -        | -        | -4.73422 |
| Val-CAC-11-2 | -        | -        | -        | -4.73422 |
| Val-CAC-1-2  | -0.35309 | -        | 0.339328 | -        |
| Val-CAC-1-3  | -0.35309 | -        | 0.339328 | -        |
| Val-CAC-1-4  | -0.35309 | -        | 0.339328 | -        |
| Val-CAC-1-5  | -0.35309 | -        | 0.339328 | -        |
| Val-CAC-1-6  | -0.35309 | -        | 0.339328 | -        |
| Val-CAC-2-1  | -        | 0.956561 | -        | -        |
| Val-CAC-4-1  | -0.35309 | -        | 0.339975 | -        |
| Val-CAC-5-1  | -0.35217 | -        | 0.358185 | -        |
| Val-TAC-2-1  | -1.28588 | -3.23338 | -2.32199 | -2.43273 |

Values are for  $\log_2$ (fold change) in tRNA levels as calculated with NOISeqBIO. Treatments: A/R,  $\log_2$ (ANG/RNase 1); A/U,  $\log_2$ (ANG/untreated). All values of  $\log_2$ (fold change) have  $p \leq 0.05$ .

**TABLE S4.** miRNA with differential levels

| miRNA Name      | $\Delta RNH1$ A/R | $\Delta RNH1$ A/U | WT A/R   | WT A/U |
|-----------------|-------------------|-------------------|----------|--------|
| hsa-miR-92b-3p  | 0.637961          | -                 | 0.917395 | -      |
| hsa-miR-21-5p   | 0.23454           | 0.391549          | -0.28297 | -      |
| hsa-miR-1246    | -3.48241          | -                 | -        | -      |
| hsa-miR-181b-5p | 0.398107          | 0.309214          | -        | -      |
| hsa-miR-192-5p  | -0.34387          | -                 | -        | -      |
| hsa-let-7i-5p   | -0.56144          | -                 | -0.72627 | -      |
| hsa-miR-196a-5p | -0.81072          | -                 | -        | -      |
| hsa-miR-183-5p  | -                 | -                 | -1.52403 | -      |
| hsa-miR-16-5p   | -                 | -                 | -0.55057 | -      |
| hsa-miR-423-3p  | 0.46394           | -                 | -        | -      |
| hsa-miR-98-5p   | -0.70656          | -                 | -0.54702 | -      |
| hsa-miR-10a-5p  | -                 | -0.56752          | -        | -      |
| hsa-let-7b-5p   | -0.44477          | -                 | -0.55481 | -      |
| hsa-miR-92a-3p  | 0.696078          | -                 | 0.685252 | -      |
| hsa-miR-191-5p  | -0.61775          | -0.58719          | -0.6549  | -      |
| hsa-let-7c-5p   | -0.88866          | -                 | -0.76867 | -      |
| hsa-miR-27b-3p  | -                 | -0.38275          | -        | -      |
| hsa-miR-148b-3p | -                 | -0.358            | -        | -      |
| hsa-miR-30a-5p  | -                 | 0.377059          | -        | -      |
| hsa-miR-93-5p   | -0.31718          | -                 | -0.78504 | -      |
| hsa-miR-99b-5p  | -                 | -1.48949          | -        | -      |
| hsa-miR-100-5p  | -                 | -0.94423          | -        | -      |
| hsa-miR-21-3p   | -                 | -0.53326          | -        | -      |
| hsa-miR-24-3p   | -                 | -                 | -1.15176 | -      |
| hsa-miR-320a    | -0.67418          | -                 | -0.79949 | -      |
| hsa-miR-99a-5p  | -                 | -1.06808          | -        | -      |
| hsa-miR-22-3p   | -                 | -0.26951          | -        | -      |
| hsa-miR-30d-5p  | -                 | 0.303704          | -        | -      |
| hsa-miR-423-5p  | 0.306335          | -                 | -        | -      |
| hsa-miR-186-5p  | -0.35832          | -                 | -        | -      |
| hsa-miR-193b-3p | -1.1136           | -                 | -1.49097 | -      |
| hsa-miR-17-5p   | -                 | -                 | -0.78964 | -      |
| hsa-miR-148a-3p | -                 | -0.39106          | -0.40573 | -      |
| hsa-miR-374a-3p | -                 | -0.86105          | -        | -      |
| hsa-miR-181a-5p | -                 | 0.36722           | -        | -      |
| hsa-miR-27a-3p  | -                 | -0.26946          | -        | -      |
| hsa-miR-106b-3p | -                 | 0.848428          | -        | -      |
| hsa-miR-126-5p  | -                 | -1.2177           | -        | -      |
| hsa-miR-30c-5p  | -                 | -0.41851          | -        | -      |
| hsa-let-7e-5p   | -                 | -0.39318          | -        | -      |
| hsa-miR-30a-3p  | -                 | -0.39102          | -        | -      |
| hsa-miR-182-5p  | -                 | 0.630049          | -        | -      |



|                 |   |          |          |   |
|-----------------|---|----------|----------|---|
| hsa-miR-20a-5p  | - | -        | -0.54094 | - |
| hsa-miR-331-3p  | - | -1.33843 | -        | - |
| hsa-miR-484     | - | -0.81671 | -        | - |
| hsa-miR-31-5p   | - | -        | -0.51893 | - |
| hsa-miR-221-3p  | - | -        | -0.66057 | - |
| hsa-miR-103a-3p | - | -        | -0.27398 | - |

---

Values are for  $\log_2(\text{fold change})$  in tRNA levels as calculated with NOISeqBIO. Treatments: A/R,  $\log_2(\text{ANG/RNase 1})$ ; A/U,  $\log_2(\text{ANG/untreated})$ . All values of  $\log_2(\text{fold change})$  have  $p \leq 0.05$ .

**Table S5.** Enriched GO terms for miRNAs

| Upregulated miRNAs                                                                  | Downregulated miRNAs                                                                                                                                                                                                                                                                                    |
|-------------------------------------------------------------------------------------|---------------------------------------------------------------------------------------------------------------------------------------------------------------------------------------------------------------------------------------------------------------------------------------------------------|
| hsa-miR-181b-5p, hsa-miR-423-3p, hsa-miR-92b-3p,<br>hsa-miR-92a-3p, hsa-miR-181a-5p | hsa-miR-192-5p, hsa-miR-98-5p, hsa-miR-196a-5p,<br>hsa-let-7c-5p, hsa-let-7i-5p, hsa-let-7b-5p, hsa-miR-<br>193b-3p, hsa-miR-320a, hsa-miR-22-3p, hsa-miR-<br>103a-3p, hsa-miR-93-5p, hsa-miR-183-5p, hsa-miR-<br>31-5p, hsa-miR-17-5p, hsa-miR-20a-5p<br>hsa-miR-24-3p, hsa-miR-221-3p, hsa-miR-192-5p |

---

Unique enriched GO terms in miRNAs upregulated after ANG treatment

---

| Name                                                                | Log size |
|---------------------------------------------------------------------|----------|
| U6 snRNA binding                                                    | 3.114    |
| RNA polymerase II repressing transcription factor binding           | 2.976    |
| 6-phosphofructo-2-kinase activity                                   | 3.356    |
| glutathione transferase activity                                    | 3.671    |
| microtubule binding                                                 | 4.557    |
| NADP binding                                                        | 4.917    |
| protein binding involved in protein folding                         | 3.250    |
| hydrogen ion transmembrane transporter activity                     | 5.115    |
| axon guidance receptor activity                                     | 2.220    |
| modified amino acid binding                                         | 4.368    |
| calcium-dependent phospholipase A2 activity                         | 1.908    |
| deacetylase activity                                                | 4.212    |
| polyubiquitin binding                                               | 3.321    |
| translation initiation factor activity                              | 4.762    |
| NAD <sup>+</sup> ADP-ribosyltransferase activity                    | 3.663    |
| steroid hormone receptor activity                                   | 3.829    |
| cyclin-dependent protein serine/threonine kinase inhibitor activity | 3.104    |
| phosphatidylinositol-3-phosphatase activity                         | 2.768    |
| protein deacetylase activity                                        | 3.833    |
| lyase activity                                                      | 5.704    |
| transcription coactivator activity                                  | 4.105    |
| centromeric DNA binding                                             | 2.906    |
| eukaryotic translation initiation factor 2 $\alpha$ kinase activity | 2.639    |
| NADPH binding                                                       | 3.704    |
| single-stranded RNA binding                                         | 3.899    |
| MAP kinase activity                                                 | 3.725    |
| ATP-dependent DNA helicase activity                                 | 4.659    |
| phosphotyrosine binding                                             | 3.104    |
| poly(A) binding                                                     | 3.024    |
| MHC class I receptor activity                                       | 1.771    |
| signal recognition particle binding                                 | 3.274    |
| fructose binding                                                    | 2.053    |
| Y-form DNA binding                                                  | 2.377    |

|                                                        |       |
|--------------------------------------------------------|-------|
| acetyltransferase activity                             | 5.239 |
| methyltransferase activity                             | 5.593 |
| transferase activity                                   | 6.472 |
| fructose-2,6-bisphosphate 2-phosphatase activity       | 2.413 |
| S-methyl-5-thioribose-1-phosphate isomerase activity   | 3.355 |
| bisphosphoglycerate 2-phosphatase activity             | 1.708 |
| bisphosphoglycerate mutase activity                    | 2.468 |
| transferase activity, transferring acyl groups         | 5.610 |
| LRR domain binding                                     | 2.515 |
| scavenger receptor activity                            | 3.761 |
| insulin receptor substrate binding                     | 2.528 |
| translation initiation factor binding                  | 3.625 |
| insulin-like growth factor binding                     | 3.297 |
| protein homodimerization activity                      | 4.493 |
| $\alpha$ -2A adrenergic receptor binding               | 2.004 |
| threonine-type endopeptidase activity                  | 4.253 |
| androgen receptor binding                              | 2.808 |
| insulin-like growth factor-activated receptor activity | 1.505 |
| peroxiredoxin activity                                 | 4.348 |

---

Unique enriched GO terms in miRNAs downregulated after ANG treatment

---

| Name                                                                                                                          | Log size |
|-------------------------------------------------------------------------------------------------------------------------------|----------|
| cofactor binding                                                                                                              | 5.897    |
| protein disulfide oxidoreductase activity                                                                                     | 4.634    |
| peroxidase activity                                                                                                           | 4.725    |
| cyclin binding                                                                                                                | 3.226    |
| hydrolase activity                                                                                                            | 6.497    |
| chemoattractant activity                                                                                                      | 2.815    |
| cell adhesion molecule binding                                                                                                | 4.095    |
| protein serine/threonine/tyrosine kinase activity                                                                             | 3.596    |
| protein tyrosine kinase activity                                                                                              | 4.288    |
| non-membrane spanning protein tyrosine kinase activity                                                                        | 3.768    |
| electron carrier activity                                                                                                     | 5.254    |
| NAD binding                                                                                                                   | 5.129    |
| L-ascorbic acid binding                                                                                                       | 3.938    |
| Hsp90 protein binding                                                                                                         | 2.934    |
| protein self-association                                                                                                      | 3.279    |
| translation factor activity, RNA binding                                                                                      | 5.107    |
| protein tyrosine phosphatase activity                                                                                         | 4.515    |
| transcription factor activity, protein binding                                                                                | 5.074    |
| phosphatidylinositol 3-kinase binding                                                                                         | 2.873    |
| Wnt-protein binding                                                                                                           | 3.083    |
| sequence-specific DNA binding                                                                                                 | 5.495    |
| oxidoreductase activity, acting on single donors with incorporation of molecular oxygen, incorporation of two atoms of oxygen | 4.399    |
| thiol-dependent ubiquitin-specific protease activity                                                                          | 4.040    |

|                                                                 |       |
|-----------------------------------------------------------------|-------|
| protein transporter activity                                    | 4.863 |
| growth factor binding                                           | 3.677 |
| peptide binding                                                 | 4.098 |
| calcium-dependent protein binding                               | 3.176 |
| DNA-directed DNA polymerase activity                            | 4.808 |
| catalytic activity                                              | 6.967 |
| helicase activity                                               | 5.236 |
| microtubule motor activity                                      | 4.487 |
| histone acetyltransferase activity                              | 3.966 |
| manganese ion binding                                           | 4.557 |
| 4 iron, 4 sulfur cluster binding                                | 5.152 |
| PDZ domain binding                                              | 3.259 |
| peptidase activity                                              | 5.756 |
| transcription corepressor activity                              | 3.847 |
| protein kinase inhibitor activity                               | 3.627 |
| RNA binding                                                     | 5.871 |
| core promoter binding                                           | 3.798 |
| receptor activity                                               | 5.579 |
| mRNA 3'-UTR binding                                             | 3.365 |
| double-stranded RNA binding                                     | 4.071 |
| DNA binding                                                     | 6.247 |
| p53 binding                                                     | 3.276 |
| ion channel binding                                             | 3.388 |
| chaperone binding                                               | 4.155 |
| histone-lysine <i>N</i> -methyltransferase activity             | 3.995 |
| single-stranded DNA binding                                     | 4.490 |
| vitamin D receptor binding                                      | 2.217 |
| methylated histone binding                                      | 3.331 |
| transforming growth factor $\beta$ -activated receptor activity | 2.529 |
| lamin binding                                                   | 2.493 |
| transforming growth factor $\beta$ binding                      | 2.667 |
| RNA polymerase II carboxy-terminal domain kinase activity       | 3.175 |

---

Enriched Molecular Function GO terms for miRNAs up- or downregulated after ANG treatment. Lists of differentially regulated miRNAs were chosen from hierarchical clusters of fold-change data generated with NOISeqBIO (see: Table S3). The GO terms listed are semantically reduced, and then analyzed for uniqueness using network analysis (see: Materials and Methods section). “Log size” refers to the extent of enrichment for a particular term.

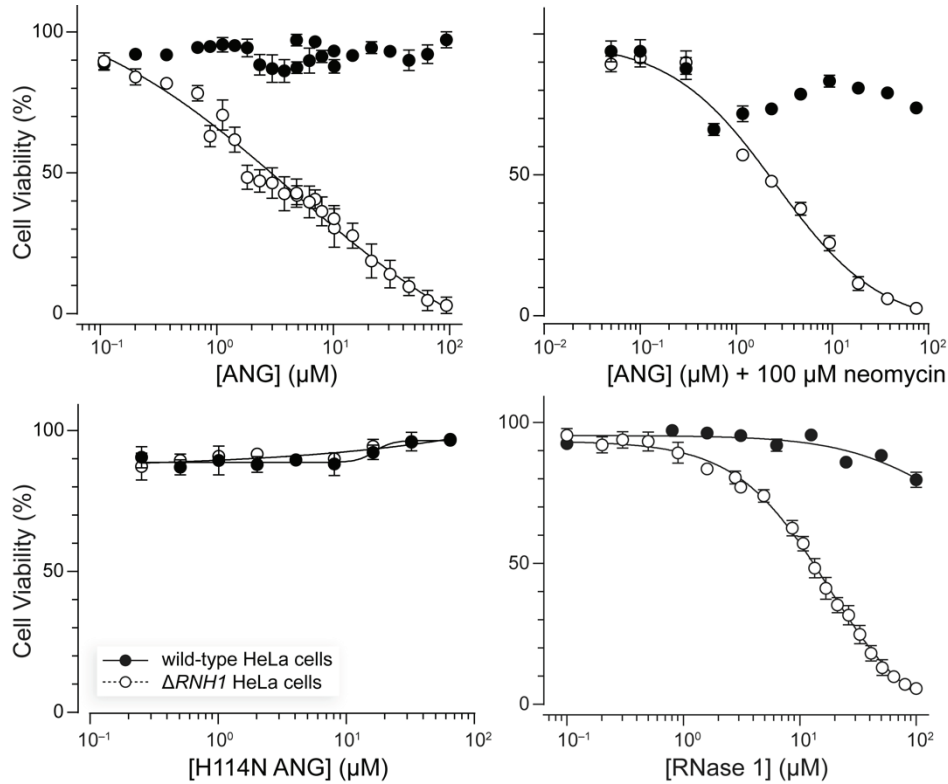

**Figure S1.** Toxicity of ANG and related proteins for wild-type and  $\Delta RNH1$  HeLa cells. Ribonucleases were incubated with cells for 48 h at 37 °C and 5%  $\text{CO}_2$ . Data points are the average of at least three biological replicates as measured with a tetrazolium dye-based assay for metabolic activity. Values of  $\text{EC}_{50}$  were calculated by fitting the data to Eq. 1 and are listed in Table 1.
